# Supplementary material for: Tuning the anisotropic facet of Cu 2 O single-crystals for photocarrier spatial segregation
Source: Royal Society of Chemistry journal article supplement (doi:10.1039/d5sc07288c), 2025-11-26
Supplement: d5sc07288c1.pdf [file d5sc07288c1.pdf]

## **SUPPLEMENTARY INFORMATION**

### **Tuning the anisotropic facet of Cu<sub>2</sub>O single-crystals for photocarrier spatial segregation**

Shuo Tian,<sup>a</sup> Yunsen Wang,<sup>a</sup> Shuyun Chen,<sup>a</sup> Zhichao Yu,<sup>a</sup> Di Wu,<sup>a</sup> Jiao Qin,<sup>a</sup> Dianyong Tang<sup>\*b</sup> and  
Dianping Tang<sup>\*a</sup>

<sup>a</sup> Key Laboratory for Analytical Science of Food Safety and Biology (MOE & Fujian Province), Department of Chemistry, Fuzhou University, Fuzhou 350108, P. R. China

<sup>b</sup> Chongqing Key Laboratory of Kinase Modulators as Innovative Medicine, College of Pharmacy (International Academy of Targeted Therapeutics and Innovation), Chongqing University of Arts and Sciences, Chongqing 402160, P. R. China

## Experimental Procedures

**Materials and Reagents.** Copper (II) Chloride Dihydrate ( $\text{CuCl}_2 \cdot 2\text{H}_2\text{O}$ , 99%), sodium hydroxide ( $\text{NaOH}$ , 96%), ascorbic acid ( $\text{C}_6\text{H}_8\text{O}_6$ , 99.7%), polyvinyl pyrrolidone (PVP,  $(\text{C}_6\text{H}_9\text{NO})_n$ , M.W. 24000), and sodium sulfate anhydrous ( $\text{Na}_2\text{SO}_4$ , 99.5%) were purchased from Aladdin Pharmaceutical Company (Shanghai, China) and used without further purification. Antibodies were purchased from Keyue Biotech. Inc. (Beijing, China). Carcinoembryonic antigen (CEA) was purchased from Zhengzhou Biocell Biotech. Co., Ltd. (Zhengzhou, China). Carcinoembryonic antigen (CEA) ELISA kit was obtained from Wuhan Cusabio Biotech. Inc. (Wuhan, China, <https://www.cusabio.com/>). Phosphate buffered saline (PBS) consisted of 0.1 M  $\text{NaH}_2\text{PO}_4$ , 0.1 M  $\text{Na}_2\text{HPO}_4$ , 0.1 M  $\text{KCl}$  (pH 7.4). Ultrapure water was treated by a Millipore water purification system (Z18 M  $\Omega$ , Milli-Q, Millipore).

**Experimental Characterization.** The scanning electron microscope (SEM) characterizations were performed on the TESCAN MIRA4 field emission scanning electron microscope. The nanoparticles were characterized by using transmission electron microscopy (TEM, FEI Talos F200s). UV-vis absorption spectra were recorded by the Infinite M200 Pro NanoQuant (Tecan, Switzerland). The portable measurement fixture was produced by the 3D printer of Formlabs Co., Ltd. X-ray photoelectron spectroscopy (XPS) was recorded on a K-Alpha X-ray photoelectron spectrometer (Thermo Fisher Scientific Co., USA). The X-ray diffraction (XRD) patterns were recorded by a Bruker D8 Advance X-ray diffractometer with  $\text{Cu K}\alpha$  lines in the range of  $2\theta$  from 20 to  $80^\circ$ . The electron paramagnetic resonance (EPR) spectra were recorded on a Bruker EMXplus X-band. The PEC measurements were performed with a microelectrochemical workstation (Shenzhen Haoyang Science and Technology Ltd).

**Testing of ultraviolet-visible diffuse reflectance spectra.** The method for testing ultraviolet-visible diffuse reflectance spectroscopy (UV-Vis DRS) is the integrating sphere technique.<sup>[1]</sup> Light emitted from the source is processed before entering the sample. It passes through an integrating sphere with an inner wall coated with  $\text{MgO}$  (or  $\text{BaSO}_4$  etc.), where the reflected light from the sample surface is collected and then projected onto a detector (a photomultiplier tube or photodiode). This generates an electrical signal, which is recorded as a function of wavelength on a chart recorder, forming a spectral curve. Generally, an integrating sphere accessory can be fitted to a UV-vis

spectrophotometer to determine the UV-Vis DRS. According to the Kubelka-Munk function, the absorbance could be calculated as follows:[2]

$$F(R_{\infty}) = K/S = \frac{(1 - R_{\infty})^2}{2R_{\infty}}$$

$$R = R_{\infty}(\text{sample})/R_{\infty}(\text{standard})$$

$$A = \lg(1/R)$$

where  $R_{\infty}$  represents the reflectance of an infinitely thick sample; K stands for the absorption coefficient; S is the scattering coefficient; A is the absorbance; R refers to the actual measured reflectance.

**Calculation of Built-In electric Field Intensity.** According to Kanata-Kito model, the built-in electric field of materials could be calculated as follows:[3]

$$F_s = (-2V_s\rho/\varepsilon\varepsilon_0)^{1/2}$$

where  $F_s$  represents the intensity of the built-in electric field;  $V_s$  stands for the surface photovoltage;  $\rho$  is the surface charge density, which will be obtained by the integral value of the current density;  $\varepsilon$  is the dielectric constant measured by the vector network analyzer;  $\varepsilon_0$  refers to the vacuum dielectric constant. The surface charge density was obtained via the integral of the transient anodic photocurrent peak. The surface voltage was measured via the open-circuit potentials.

**DFT Calculation.** Density function theory (DFT) calculations based on the first principle were analyzed using Materials Studio software.[4-6] The generalized gradient approximation (GGA) method was chosen for the exchange-correlation energy approximation method, and the PBE (Perdew-Burke-Ernzerhof) function was selected as the gradient function. The plane-wave pseudopotential method was used to realize the DFT-related calculation. The selection of suitable high symmetry points k describing the Brillouin zone was based on the Monkhorst-Pack method. The convergence accuracy was set to less than 0.05 eV Å<sup>-1</sup> for the residual force on each atom and a convergence tolerance of 10<sup>-7</sup> for the energy difference of two consecutive self-consistent calculations.

The structure of Cu<sub>2</sub>O {100} and {111} facets was built based on a 3 × 3 superunit with the original structural atom of Cu<sub>2</sub>O. The adsorption energy ( $E_{\text{ads}}$ ) between the catalyst slab and adsorption molecules was calculated by the following equation:

$$E_{ads} = E_{total} - E_a^* - E_{slab}$$

Where  $E_{total}$ ,  $E_a$ , and  $E_{slab}$  are the total energy of the optimized adsorbate on the catalyst surface, the energy of adsorption molecules, and the catalyst surface, respectively, and all of the energies are in the units of eV.

**Design and Construction of 3D Printed Support Devices.** The integrated photoelectrochemical microcell device was supported via one-step direct 3D printing.<sup>[7]</sup> The execution procedure of the stereo model was performed with the assistance of a Form2 3D printer (Formlabs, USA). The photosensitive resin of choice was clear resin (FLGPCL04), purchased from a local distributor. After printing, additional liquid resin was cleaned with isopropyl alcohol, and the kit was stored in a cool place.

**Preparation Method of Cu<sub>2</sub>O Modified Fluorine-doped Tin Oxide (FTO).** (i) Wash the new FTO glass with ethanol and deionized water and dry at room temperature; (ii) Bonded with waterproof scotch tape with a radius of 3 mm, the cleaned FTO is treated with a punch; (iii) the aqueous suspension of Cu<sub>2</sub>O prepared above was thrown on the surface of FTO and dried at room temperature; and (iiii) measurement of photocurrent in a cell made by an electropotentiostat.

**Measurement of Photoelectrochemical (PEC) Properties.** The electrochemical and PEC properties were investigated on the CHI-660E electrochemical workstation. The working electrolyte utilized was 0.1 M Na<sub>2</sub>SO<sub>4</sub> with a standard three-electrode system for the synthesized samples. The Ag/AgCl and Pt wire served as the reference and counter electrodes. Synthesized x-Cu<sub>2</sub>O photoelectrodes were used as working electrodes. No bias was applied, except as specially indicated. The PEC measurements were carried out under visible-light illumination (Xe lamp  $\lambda > 400$  nm; power intensity: 500 W). The monochromatic light irradiation was adopted Xe lamp equipped with 400 nm, 450 nm, 500 nm, 550 nm, 600 nm and 650 nm filters. The optical power meter (Thorlabs) was utilized to evaluate the power density of each wavelength. The transient photocurrent response was achieved by light shutter. The cycles were all 20 seconds with 10 seconds for illumination and 10 seconds for switching off. Mott-Schottky (MS) plots were obtained at a frequency of 2000 Hz with an amplitude of 10 mV without illumination.

**Preparation of mAb<sub>1</sub>-Coated Microplate.** Monoclonal antibodies to CEA were prepared and bonded in microtiter plates as follows. The purchased mAb<sub>1</sub> (50  $\mu$ L per well, 10  $\mu$ g mL<sup>-1</sup>) was added

to a high-binding 96-well microplate containing sodium carbonate buffer (0.05 M, pH 9.6), and then incubated for 24 h at 4 °C. A plastic film is wrapped over the microplate to prevent evaporation of the liquid. The completed incubated microplates were removed and washed three times with PBS (pH 7.4) buffer containing 0.05 % Tween 20 (v/v). This was followed by incubation for 1 h by adding closure buffer (300  $\mu$ L of PBS solution per well (10 mM, pH 7.4) including 1.0 wt % BSA). The aforementioned prepared microtiter plates were prepared for the CEA assay. Finally, the treated plates were stored at 4 °C and used as soon as possible.

**Preparation of GOx/pAb<sub>2</sub>-Conjugated AuNP (GOx-AuNP-pAb<sub>2</sub>).** GOx-AuNPs-pAb<sub>2</sub> conjugates were prepared according to our previous reports. Firstly, gold colloids (5.0 mL, 5.0 ng mL<sup>-1</sup>) were adjusted to pH 9.5 by using 0.1 M Na<sub>2</sub>CO<sub>3</sub> aqueous solution. Then, 200  $\mu$ L of GOx (0.5 mg mL<sup>-1</sup>) and 50  $\mu$ L of pAb<sub>2</sub> (0.5 mg mL<sup>-1</sup>) were injected into colloidal gold nanoparticles and gently shaken for 30 min at room temperature on a shaker (MS, IKA GmbH, Staufen, Germany). 100  $\mu$ L of polyethylene glycol (1.0 wt %) was added into the suspension. The mixture was further incubated for 12 h at 4 °C. Finally, GOx-AuNP-pAb<sub>2</sub> conjugates were obtained by centrifugation at 4 °C (10 min, 13000 g), and dispersed in 1.0 mL of 2 mM sodium carbonate solution ( $C_{[\text{AuNP}]} \approx 25 \text{ ng mL}^{-1}$ ) containing 1.0 wt % BSA and 0.1 wt % sodium azide, pH 7.4, and stored at 4 °C for further use.

**Monitoring of Human Serum Samples and Interlaboratory.** Before measurement, these collected human serum samples from Fujian Provincial Hospital (Fuzhou, China) were initially centrifuged for 5 min at 4 °C with 5,000g (centrifugal force) to remove any impurities and macromolecules that might be present. Thereafter, the obtained supernatant fluids were determined using the developed PEC immunoassay and the commercialized human CEA ELISA kit, respectively. The high-concentration CEA samples were diluted with PBS (10 mM, pH 7.4). All the experiments were performed according to the Guidelines of Fuzhou University (China) and approved by the ethics committee at Fuzhou University (China). Informed consents were obtained from human participants of this study. CEA levels in these specimens were calculated based on the calibration curve in Fig. 5B, referring to the obtained photocurrents per sample. For comparison, these samples were determined by commercialized available human CEA ELISA kits as the reference. The method accuracy and interlaboratory validation were evaluated by using a Student's t-test method.

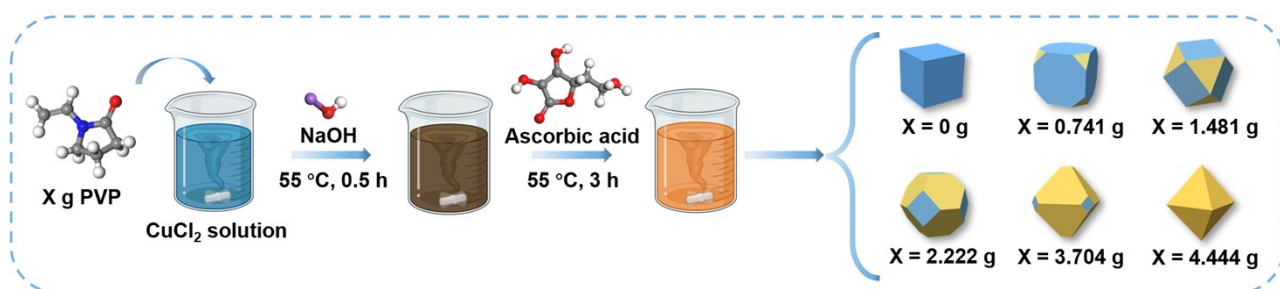

**Fig. S1.** Schematic of the synthesis of  $\text{Cu}_2\text{O}$  with different crystal facets exposed.

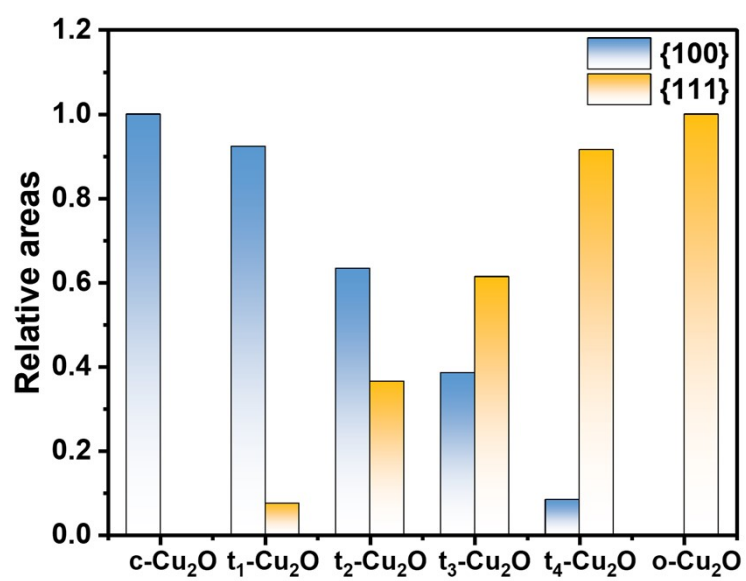

**Fig. S2.** The relative areas of different exposed facets in Cu<sub>2</sub>O crystals.

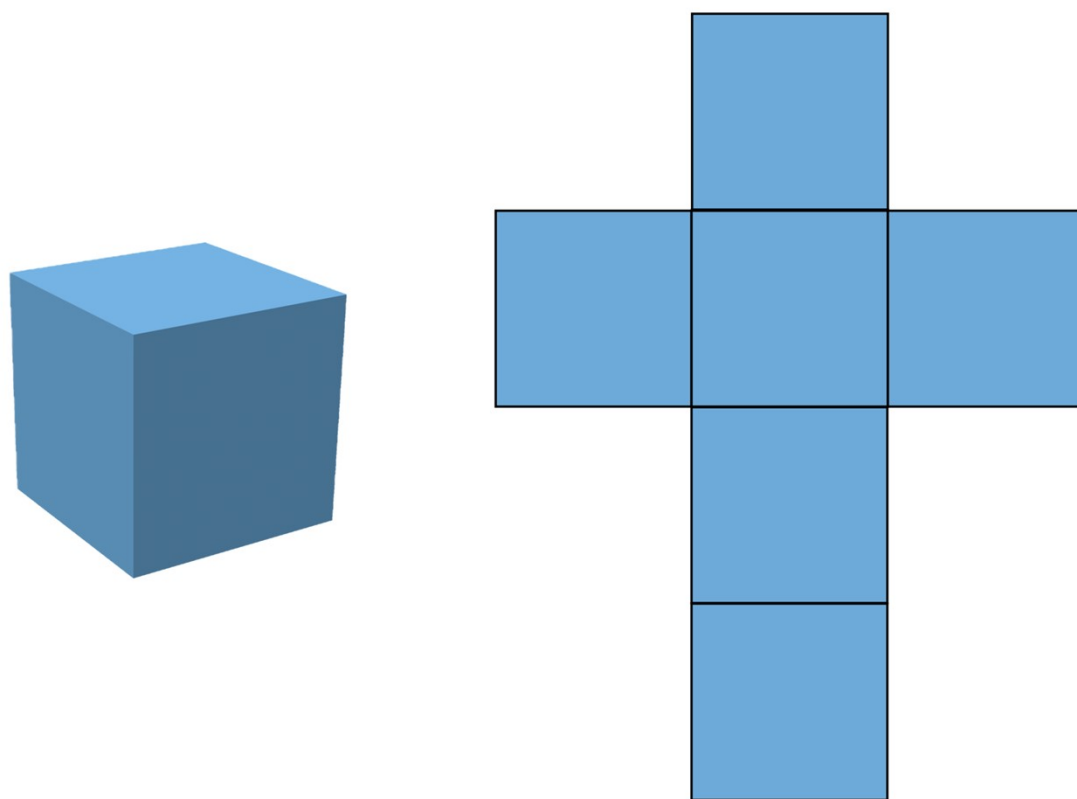

**Fig. S3.** The schematic and unfolded diagrams of c-Cu<sub>2</sub>O.



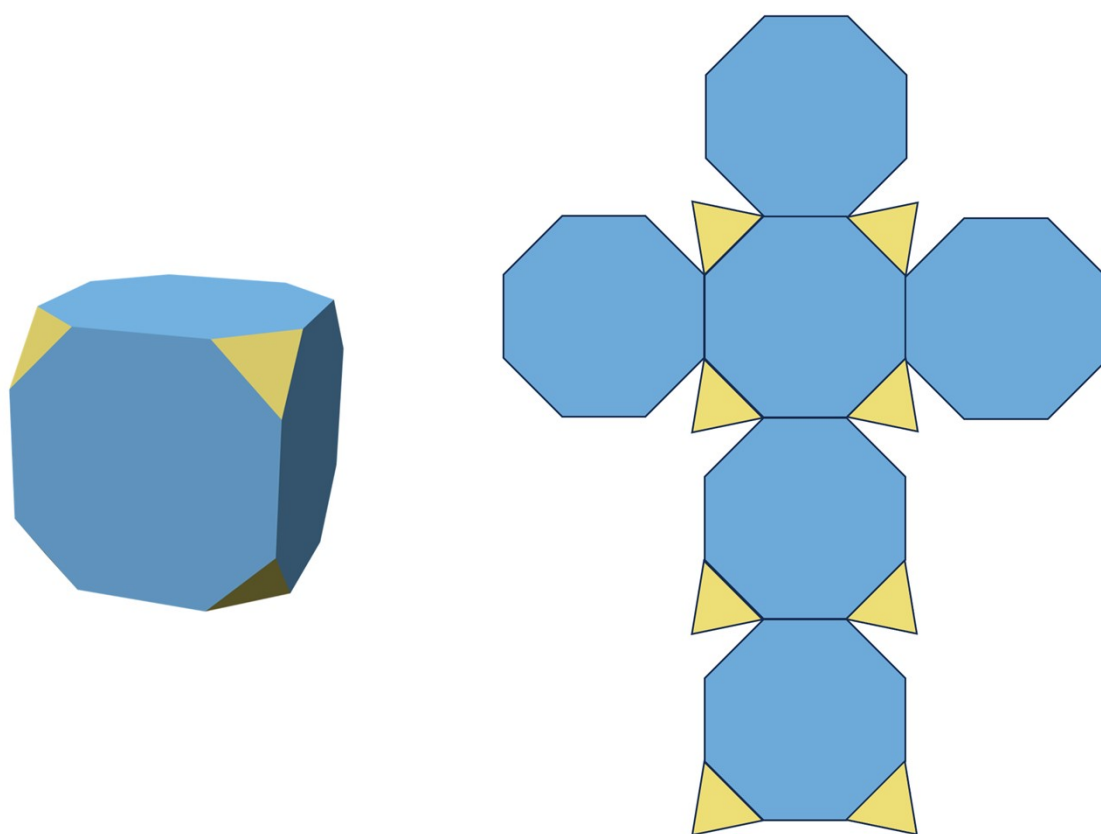

**Fig. S4.** The schematic and unfolded diagrams of  $t_1$ - $\text{Cu}_2\text{O}$ .

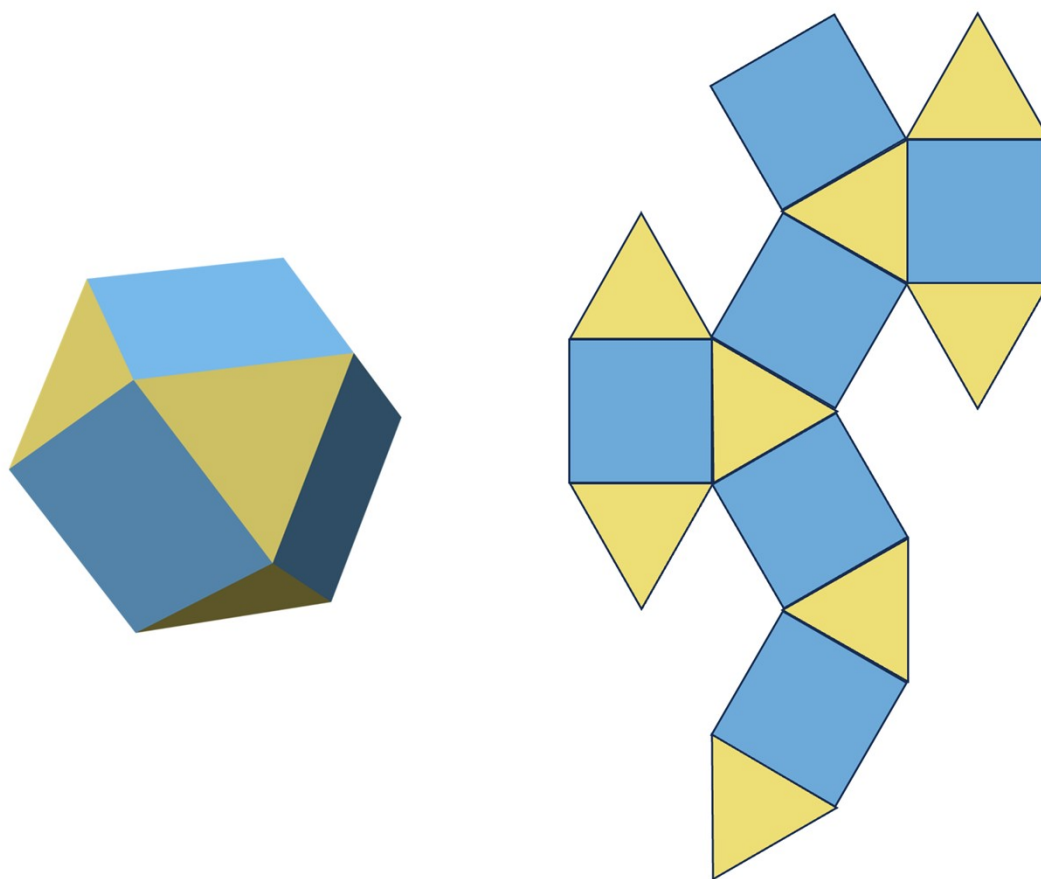

**Fig. S5.** The schematic and unfolded diagrams of  $t_2$ -Cu<sub>2</sub>O.

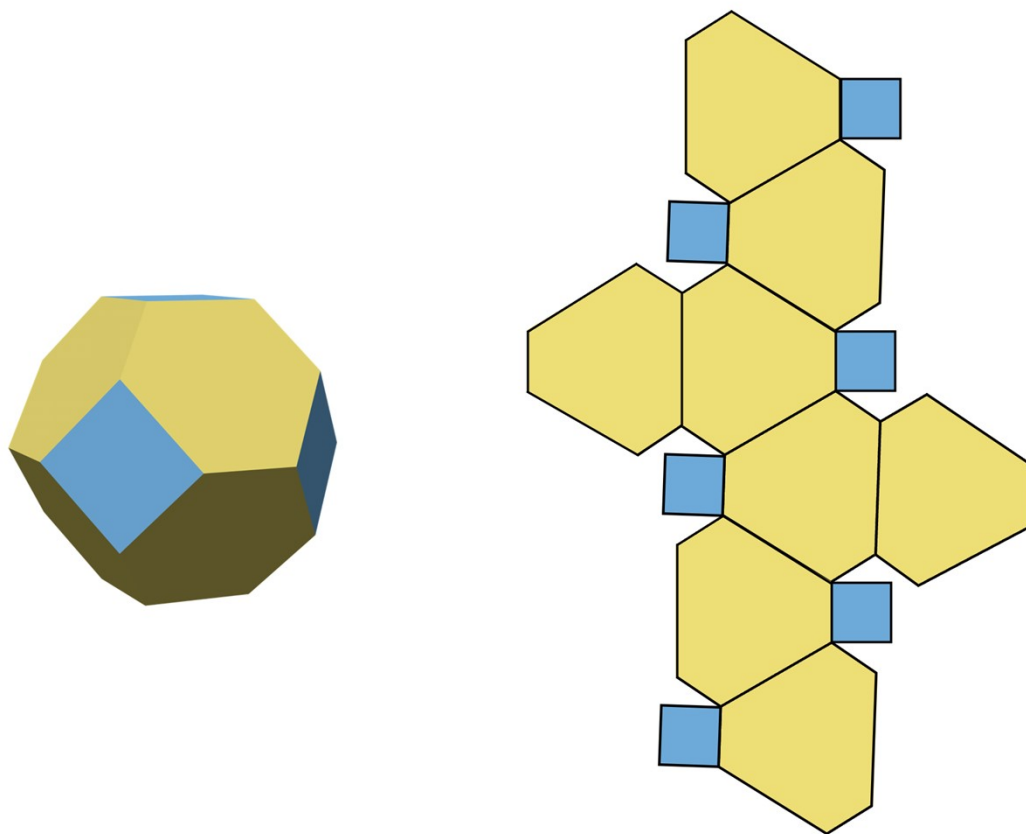

**Fig. S6.** The schematic and unfolded diagrams of  $t_3$ - $\text{Cu}_2\text{O}$ .

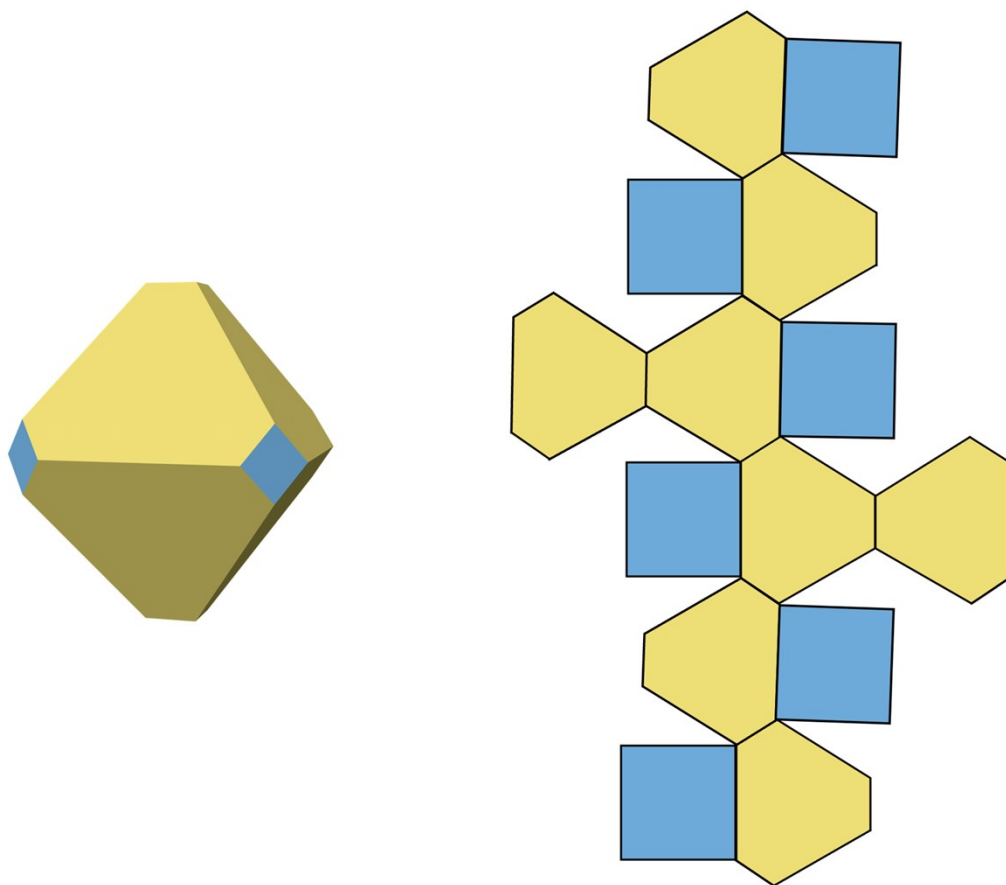

**Fig. S7.** The schematic and unfolded diagrams of  $t_4$ - $\text{Cu}_2\text{O}$ .

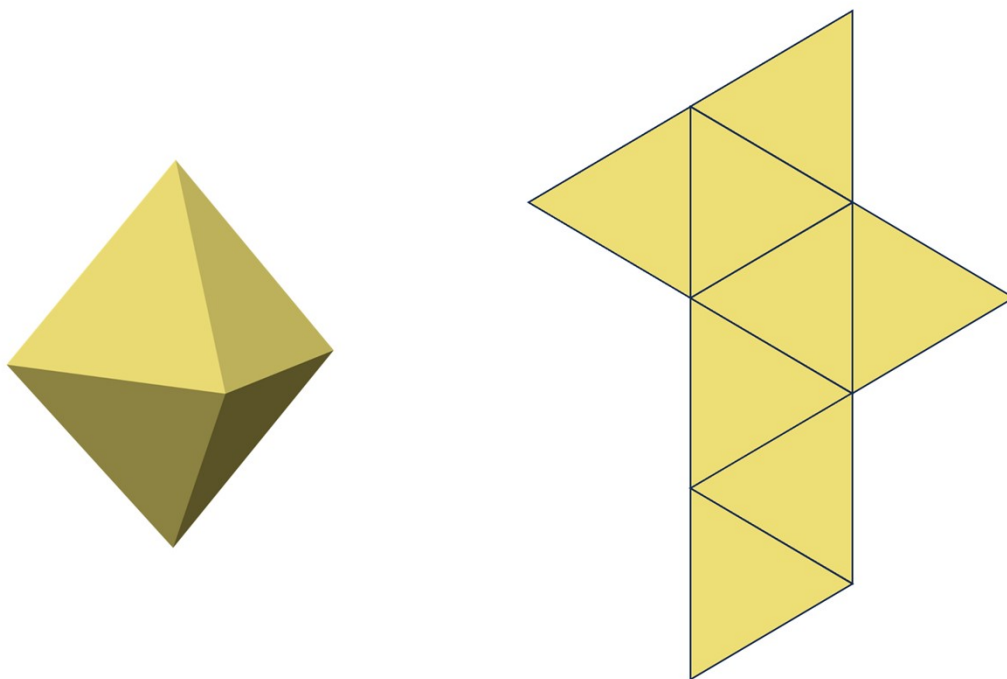

**Fig. S8.** The schematic and unfolded diagrams of o-Cu<sub>2</sub>O.

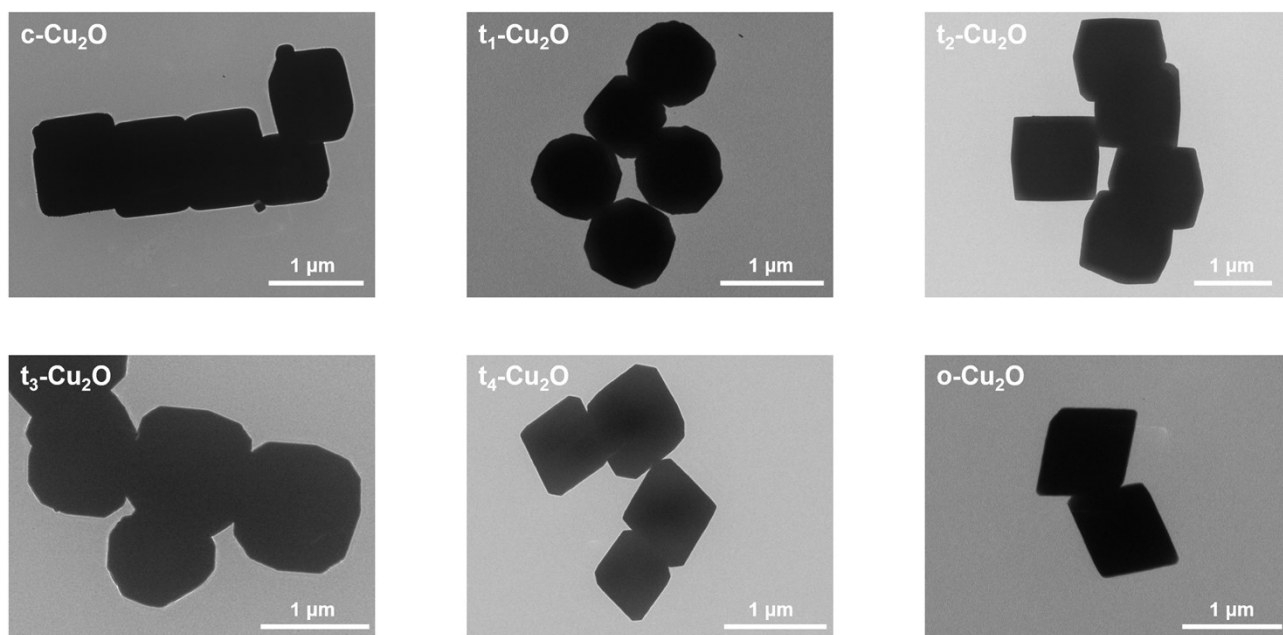

**Fig. S9.** Low-magnification TEM images of c- $\text{Cu}_2\text{O}$ , t<sub>1-4</sub>- $\text{Cu}_2\text{O}$ , and o- $\text{Cu}_2\text{O}$ .

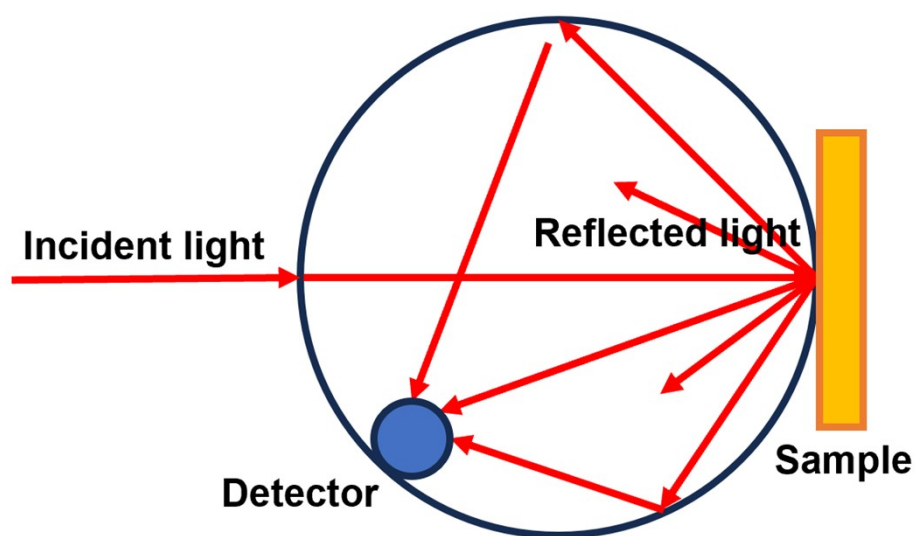

**Fig. S10.** Optical path diagram of integrating sphere in reflectance mode.

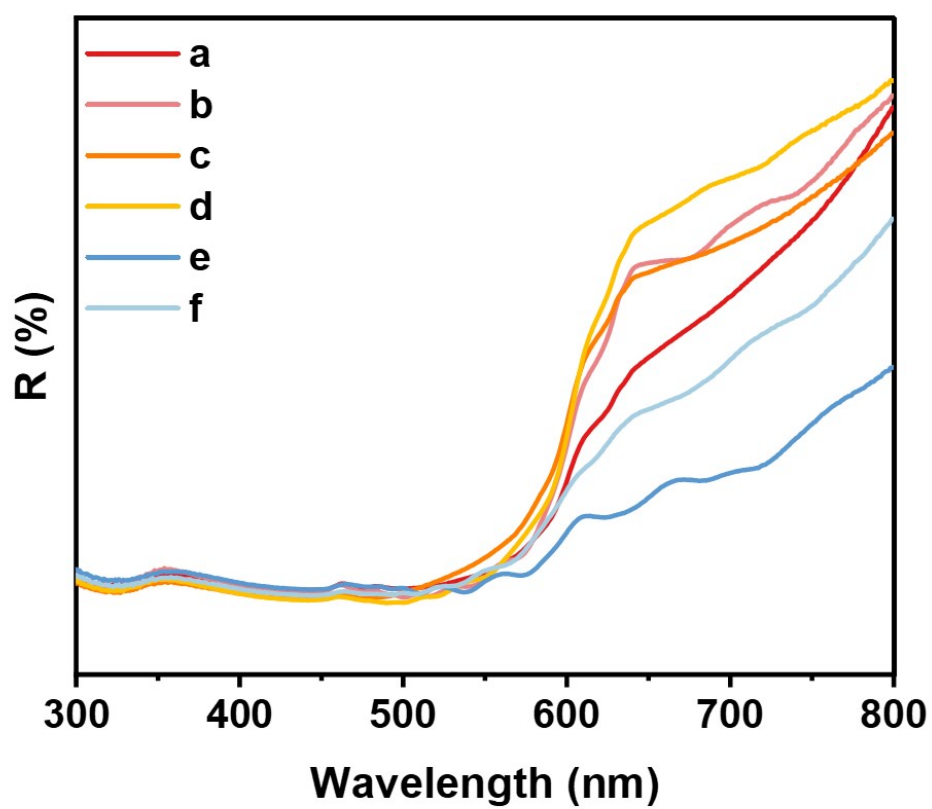

**Fig. S11.** Reflectance spectra of (a) c- $\text{Cu}_2\text{O}$ , (b)  $\text{t}_1$ - $\text{Cu}_2\text{O}$ , (c)  $\text{t}_2$ - $\text{Cu}_2\text{O}$ , (d)  $\text{t}_3$ - $\text{Cu}_2\text{O}$ , (e)  $\text{t}_4$ - $\text{Cu}_2\text{O}$ , and (f) o- $\text{Cu}_2\text{O}$ .



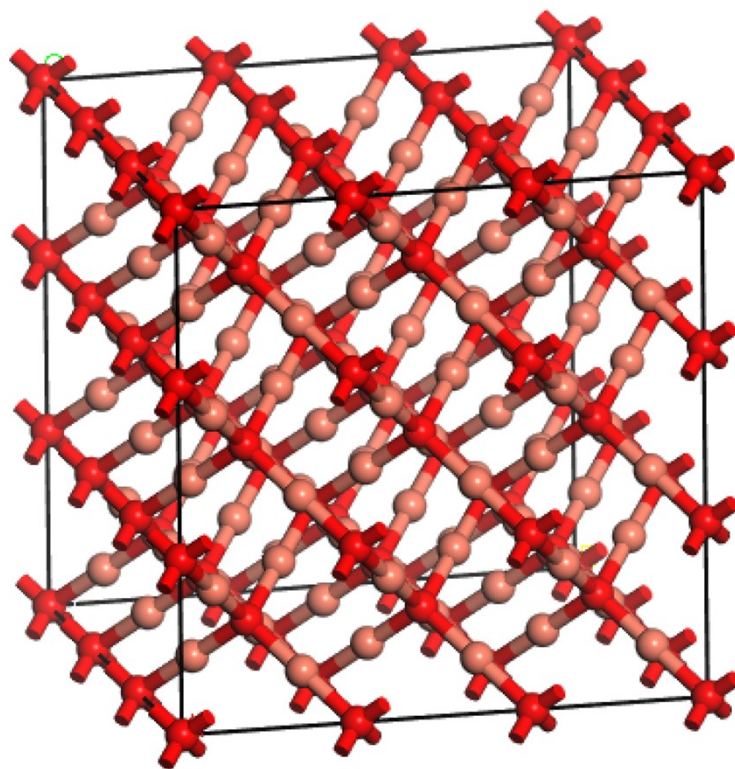

**Fig. S12.** Geometrically optimized models for  $\text{Cu}_2\text{O}$  bulk.

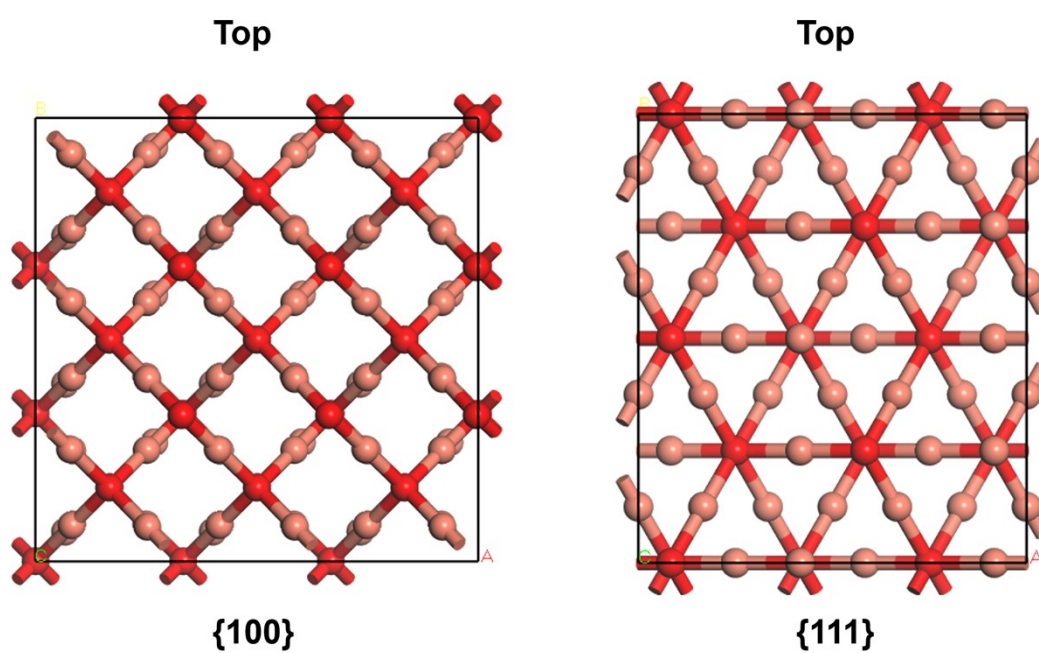

**Fig. S13.** Top view of the optimized structures of Cu<sub>2</sub>O {100} and {111} crystal facets.

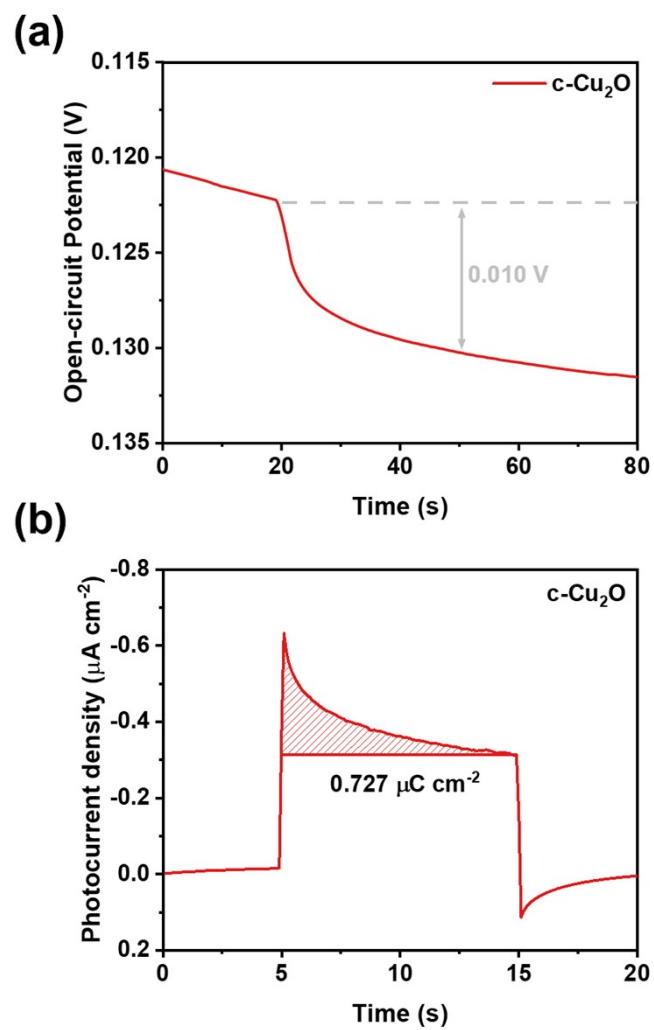

**Fig. S14.** (a) Surface voltage and (b) transient photocurrent density of c-Cu<sub>2</sub>O.

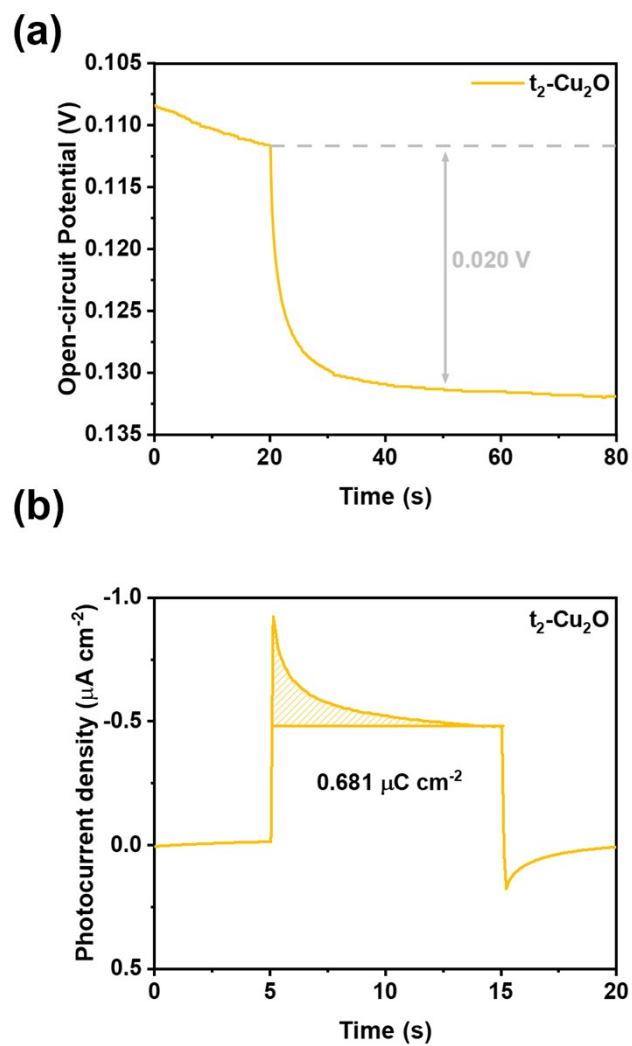

**Fig. S15.** (a) Surface voltage and (b) transient photocurrent density of  $t_2\text{-Cu}_2\text{O}$ .

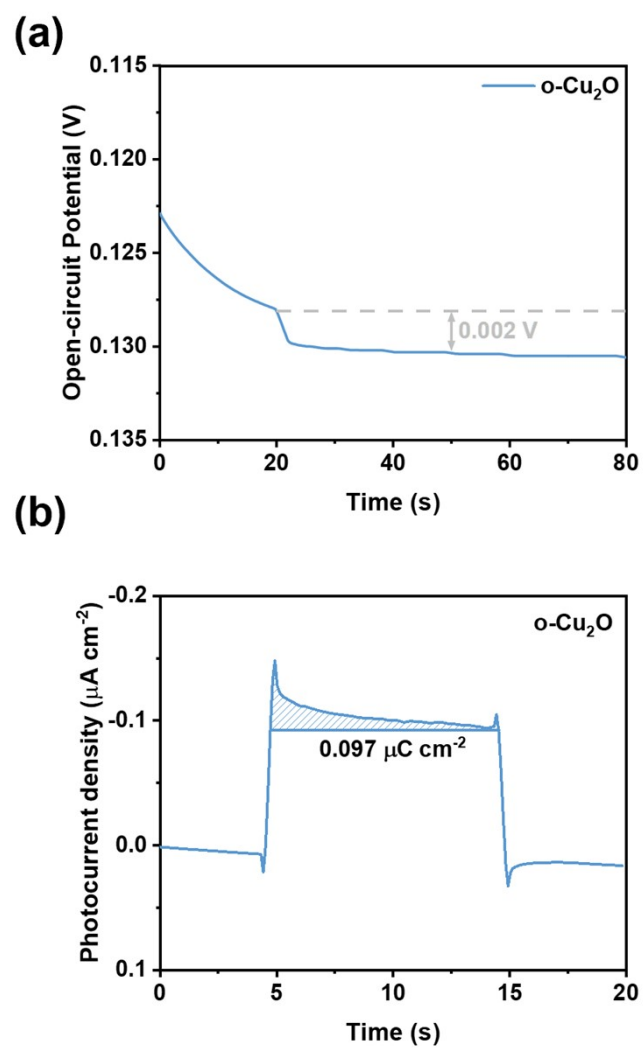

**Fig. S16.** (a) Surface voltage and (b) transient photocurrent density of o-Cu<sub>2</sub>O.

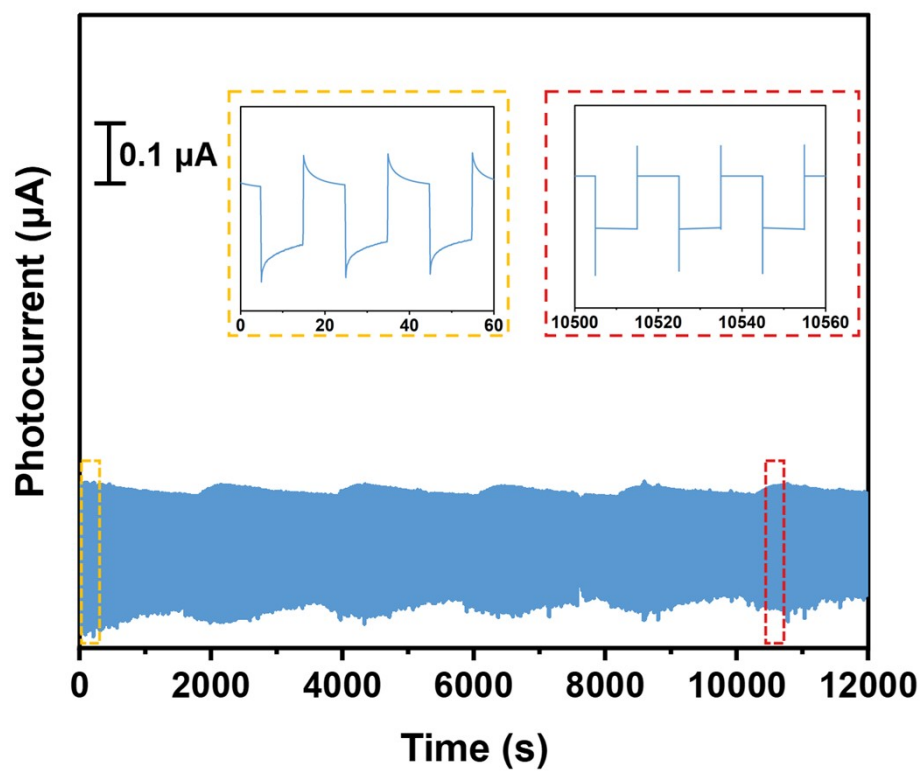

**Fig. S17.** Long-term cycling stability testing of the PEC biosensor under conditions of  $25 \text{ ng mL}^{-1}$  CEA.

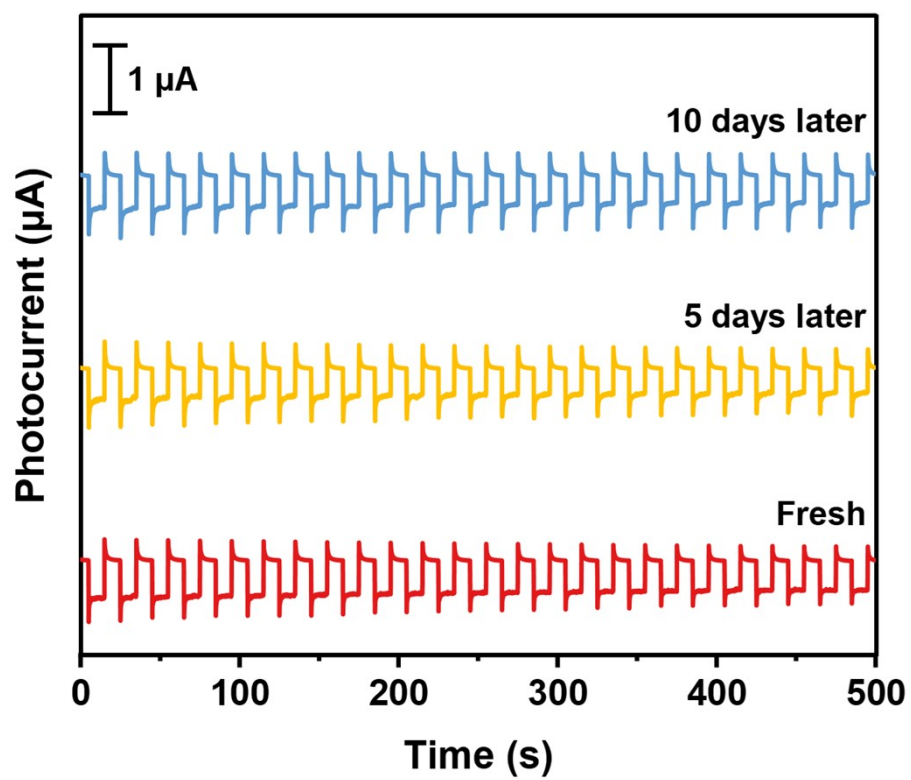

**Fig. S18.** Time stability test of  $t_2$ - $\text{Cu}_2\text{O}$  photoelectrode with time duration of 5 days and 10 days.

**Table S1.** The optical power densities for each wavelength.

| Wavelength (nm)                                | 400    | 450    | 500    | 550    | 600    | 650    |
|------------------------------------------------|--------|--------|--------|--------|--------|--------|
| $P_{\lambda\text{-in}}$ (mW cm <sup>-2</sup> ) | 0.2964 | 0.2632 | 0.2374 | 0.1988 | 0.1534 | 0.1140 |



**Table S2.** Comparison of PEC performance of recent reported Cu<sub>2</sub>O-based photoelectrodes.

| No. | Photoelectrodes                       | Photocurrent ( $\mu\text{A}$ ) | Bias voltage                 | $E_g$ (eV) | Ref.      |
|-----|---------------------------------------|--------------------------------|------------------------------|------------|-----------|
| 1   | H-Cu <sub>2</sub> O/GCE               | 0.132                          | -0.1 V vs. Ag/AgCl           | 1.94       | [8]       |
| 2   | Cu <sub>2</sub> O@Ni foam             | -0.400                         | 0 V vs. Ag/AgCl              | 2.10       | [9]       |
| 3   | IL-Cu@Cu <sub>2</sub> O               | -0.385                         | 0 V vs. Hg/HgCl <sub>2</sub> | 1.98       | [10]      |
| 4   | Cu <sub>2</sub> O                     | 0.150                          | 0 V vs. Ag/AgCl              | 2.27       | [11]      |
| 5   | t <sub>2</sub> -Cu <sub>2</sub> O/FTO | -0.925                         | 0 V vs. Ag/AgCl              | 1.95       | This work |

**Table S3.** Comparison of the PEC biosensor prepared in this study with other reported methods for determining CEA.

| No. | Method                                | Response range (ng mL <sup>-1</sup> ) | LOD (ng mL <sup>-1</sup> ) | Ref.      |
|-----|---------------------------------------|---------------------------------------|----------------------------|-----------|
| 1   | Fluorescent lateral flow immunoassay  | 1 – 320                               | 0.37                       | [12]      |
| 2   | Gas-mediated fluorescence immunoassay | 0.6 - 20                              | 0.078                      | [13]      |
| 3   | Colorimetric aptasensing strategy     | 4 - 25                                | 0.19                       | [14]      |
| 4   | Nanopore-based strategy               | 2 - 200                               | 0.6                        | [15]      |
| 5   | photoelectrochemical                  | 0.1 - 50                              | 58                         | [16]      |
| 6   | photoelectrochemical                  | 0.01 - 50                             | $9.31 \times 10^{-3}$      | This work |

**Table S4.** Comparison of the analytical results between the PEC immunoassay and the commercial CEA ELISA kit in human serum samples.

| Sample no. | Method accuracy [Conc.: mean $\pm$ SD (RSD), ng mL <sup>-1</sup> , n = 3] |                          | $t_{\text{exp}}$ |
|------------|---------------------------------------------------------------------------|--------------------------|------------------|
|            | PEC immunoassay                                                           | CEA ELISA                |                  |
| 1          | 2.62 $\pm$ 0.17 (6.49%)                                                   | 2.73 $\pm$ 0.21 (7.69%)  | 0.71             |
| 2          | 16.17 $\pm$ 1.41 (8.72%)                                                  | 18.32 $\pm$ 1.33 (7.26%) | 1.92             |
| 3          | 7.96 $\pm$ 0.74 (9.30%)                                                   | 7.68 $\pm$ 0.67 (8.72%)  | 0.49             |
| 4          | 39.52 $\pm$ 1.75 (4.43%)                                                  | 36.48 $\pm$ 1.56 (4.28%) | 2.25             |
| 5          | 12.85 $\pm$ 1.12 (8.72%)                                                  | 11.54 $\pm$ 0.93 (8.06%) | 1.56             |
| 6          | 19.37 $\pm$ 1.72 (8.88%)                                                  | 22.41 $\pm$ 1.36 (6.07%) | 2.40             |

## References

- [1] K. Ullah, L. Zhu, Z. Meng, S. Ye, Q. Sun, W. Oh, *Chem. Eng. J.* **2013**, 231, 76.
- [2] S. Khan, J. Steffy, M. Safa, H. AL-Shwaiman, V. Subhiksha, A. Syed, L. Wong, M. Verma, *Colloids Surf., A* **2025**, 727, 138214.
- [3] X. Zhu, Y. Jia, Y. Liu, J. Xu, H. He, S. Wang, Y. Shao, Y. Zhai, Y. Zhu, *Angew. Chem., Int. Ed.* **2024**, 63, e202405962.
- [4] G. Kresse, J. Furthmüller, *Phys. Rev. B* **1996**, 54, 11169.
- [5] G. Kresse, J. Hafner, *Phys. Rev. B* **1993**, 47, 558.
- [6] Z. Yu, H. Gong, Y. Gao, L. Li, F. Xue, Y. Zeng, M. Li, X. Liu, D. Tang, *Small* **2022**, 18, 2202564.
- [7] Z. Yu, H. Gong, M. Li, D. Tang, *Biosens. Bioelectron.* **2022**, 218, 114751.
- [8] C. Wang, J. Chen, L. Zhang, Y. Yang, M. Huang, C. Chen, C. Li, Y. Xie, P. Zhao, J. Fei, *Carbon* **2022**, 198, 101.
- [9] Y. Zhu, Y. Liu, Y. Xu, Y. Ruan, G. Fan, W. Zhao, J. Xu, H. Chen, *ACS Appl. Mater. Interfaces* **2019**, 11, 25702.
- [10] J. Li, H. Wang, M. Liu, Y. Qin, Q. Fang, R. Tan, L. Hu, W. Gu, C. Zhu, *Anal. Chem.* **2023**, 95, 10044.
- [11] C. Ma, D. Jiang, L. Zeng, Y. Zhou, N. Xu, M. Yang, L. Zhu, X. Xu, *Sens. Actuators B Chem.* **2025**, 445, 138575.
- [12] Z. Song, Y. Suo, S. Duan, S. Zhang, L. Liu, B. Chen, Z. Cheng, *Biosens. Bioelectron.* **2023**, 224, 115063.
- [13] S. Liu, D. Lin, Y. Lai, L. Hou, T. Lin, S. Zhao, *Anal. Chem.* **2022**, 94, 18074.
- [14] L. Yang, M. Cui, Y. Zhang, L. Jiang, H. Liu, Z. Liu, *Sens. Actuators B Chem.* **2022**, 350, 130857.
- [15] H. Tang, H. Wang, C. Yang, D. Zhao, Y. Qian, Y. Li, *Anal. Chem.* **2020**, 92, 3042.
- [16] P. Song, M. Wang, Y. Duan, A. Wang, Y. Xue, L. Mei, J. Feng, *Microchim Acta* **2023**, 190, 85.
